# Supplementary material for: Five-membered N-heterocyclic beryllium(i) compounds: fluctuating electronic structures with ambiphilic reactivity
Source: Royal Society of Chemistry journal article supplement (doi:10.1039/d2dt03263e), 2023-01-01
Supplement: d2dt03263e1.pdf [file d2dt03263e1.pdf]

## Supporting Information

### Five-Membered N-Heterocyclic Beryllium(I) Compounds: Fluctuating Electronic Structure with Ambiphilic Reactivity

Sneha Parambath , Jishnu Narayanan S J , Pattiyil Parameswaran\*

|                                                               |                       |
|---------------------------------------------------------------|-----------------------|
| Optimized geometries                                          | Figure S1             |
| MOs of compound <b>1</b>                                      | Figure S2             |
| NBO analysis                                                  | Table S1              |
| Electrostatic potential                                       | Table S2              |
| NICS analysis                                                 | Table S3              |
| EDA-NOCV analysis of<br>different bonding possibilities       | Scheme S1, Table S4   |
| NOCV-deformation density plots                                | Figure S3 – Figure S4 |
| Vertical electron affinity and<br>vertical ionization energy  | Table S5              |
| MOs of protonated and<br>hydride adducts of compound <b>1</b> | Figure S5             |
| Optimized geometries of ligands                               | Figure S6             |
| Wiberg bond indices                                           | Table S6              |
| CASSCF calculations                                           | Table S7              |
| Hirshfeld charge analysis                                     | Table S8              |
| Comparison of reaction energies with<br>Different grids       | Table S9              |
| MOs of BH <sub>3</sub> adducts of <b>1</b> and <b>2</b>       | Figure S7             |
| MOs of 1-W(CO) <sub>5</sub>                                   | Figure S8             |
| Cartesian coordinates of molecules                            |                       |

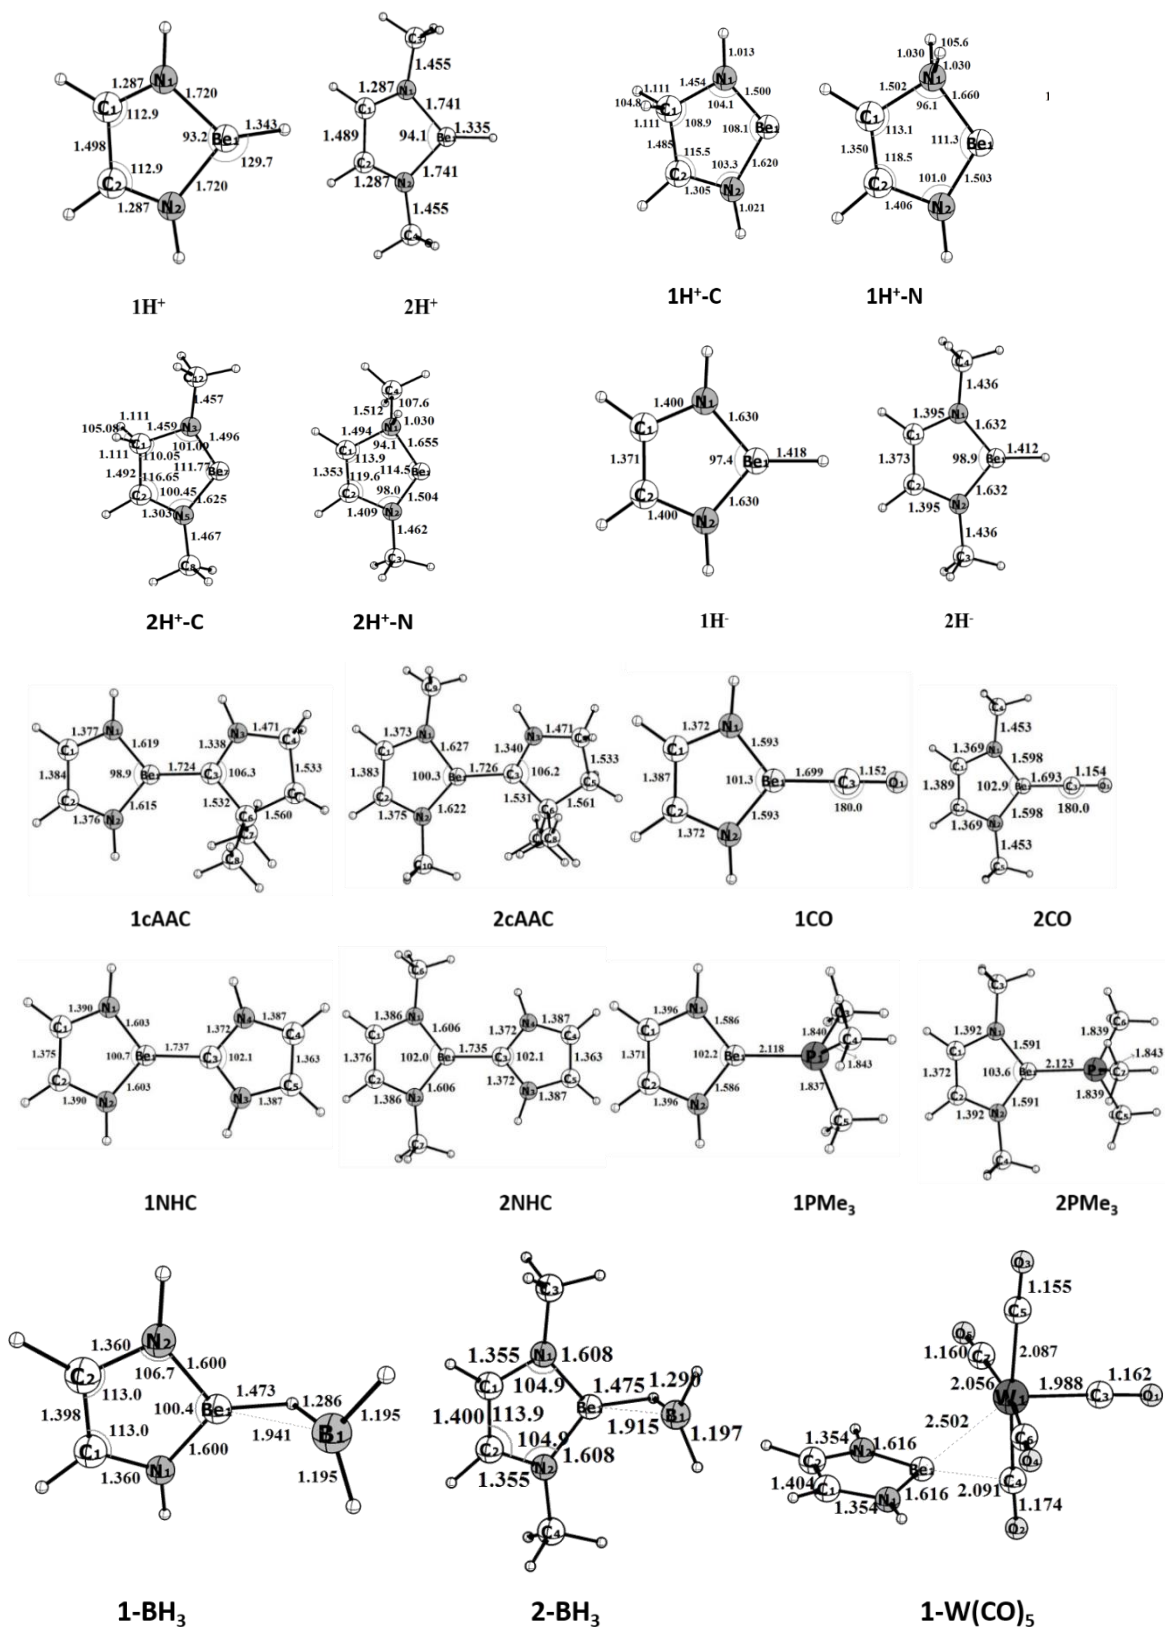

**Figure S1.** Equilibrium geometries and important geometric parameters of adducts of **1** and **2**, at the BP86/def2-TZVPP level of theory.

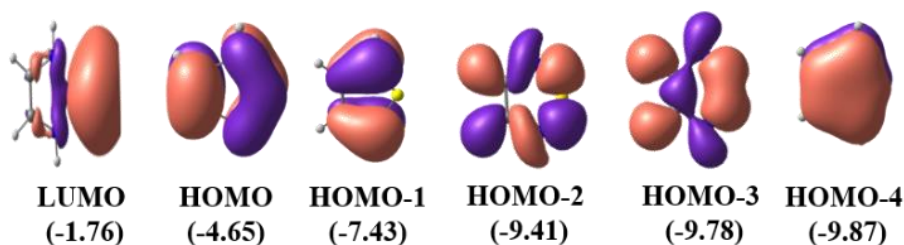

**Figure S2:** Important molecular orbitals of **1** at the M06/def2-TZVPP//BP86/def2-TZVPP level of theory. Eigenvalues are given in eV.

**Table S1.** Relative energy, charge distribution, and orbital occupancies on beryllium from NBO analysis of **1**, **1'**, **2**, and **2'** at the M06/def2-TZVPP//BP86/def2-TZVPP level of theory.

| Molecule  | Relative Energy<br>(kcal/mol) | Charge         |                |                |                |                | Occupancies on Be |                 |                 |                 |
|-----------|-------------------------------|----------------|----------------|----------------|----------------|----------------|-------------------|-----------------|-----------------|-----------------|
|           |                               | $q(\text{Be})$ | $q(\text{N1})$ | $q(\text{N2})$ | $q(\text{C1})$ | $q(\text{C2})$ | 2s                | 2p <sub>x</sub> | 2p <sub>y</sub> | 2p <sub>z</sub> |
| <b>1</b>  | 0                             | 1.21           | -1.07          | -1.07          | -0.11          | -0.11          | 0.24              | 0.26            | 0.26            | 0.03            |
| <b>1'</b> | 25.8                          | 0.55           | -0.87          | -0.87          | 0.02           | 0.02           | 0.76              | 0.27            | 0.31            | 0.09            |
| <b>2</b>  | 0                             | 1.22           | -0.86          | -0.86          | -0.11          | -0.11          | 0.24              | 0.26            | 0.25            | 0.03            |
| <b>2'</b> | 23.03                         | 0.57           | -0.67          | -0.67          | 0.02           | 0.02           | 0.75              | 0.15            | 0.43            | 0.08            |

**Table S2.** Molecular electrostatic potential on selected atoms of **1** and **2** on the Van der Waals surface at the M06/def2-TZVPP//BP86/def2-TZVPP level of theory.

| Atom | Electrostatic Potential (kcal/mol) |          |
|------|------------------------------------|----------|
|      | <b>1</b>                           | <b>2</b> |
| Be   | 30.4                               | 31.37    |
| N1   | -16.51                             | -14.32   |
| N2   | -16.63                             | -14.26   |
| C1   | -25.91                             | -23.52   |
| C2   | -25.88                             | -23.49   |

**Table S3.** NICS values calculated for BeL and its adducts with proton, hydride and ligands calculated at the M06/def2-TZVPP//BP86/def2-TZVPP level of theory.

| Molecules               | NICS(0) <sup>a</sup> | NICS(1) <sup>a</sup> | NICS(-1) <sup>a</sup> |
|-------------------------|----------------------|----------------------|-----------------------|
|                         | (NICS(0)zz)          | (NICS(1)zz)          | (NICS(-1)zz)          |
| <b>1</b>                | -7.8<br>(5.1)        | -4.1<br>(-11.2)      | -4.1<br>(-10.8)       |
| <b>2</b>                | -7.8<br>(7.2)        | -3.7<br>(-9.6)       | -3.7<br>(-9.6)        |
| <b>NHC</b>              | -13.2<br>(-12.7)     | -10.3<br>(-29.3)     | -10.3<br>(-29.3)      |
| <b>1H<sup>+</sup></b>   | 3.3<br>(19.7)        | -1.7<br>(-0.14)      | -0.83<br>(-0.14)      |
| <b>2H<sup>+</sup></b>   | 4.7<br>(25.6)        | -0.56<br>(3.9)       | -0.57<br>(3.9)        |
| <b>1H<sup>+</sup>-C</b> | -3.9<br>(13.11)      | -2.9<br>(-6.6)       | -2.9<br>(-6.6)        |
| <b>2H<sup>+</sup>-C</b> | -4.1<br>(14.3)       | -2.9<br>(-4.8)       | -2.9<br>(-4.8)        |
| <b>1H<sup>+</sup>-N</b> | -2.17<br>(20.0)      | -0.8<br>(-0.5)       | -0.8<br>(-0.5)        |
| <b>2H<sup>+</sup>-N</b> | -2.4<br>(18.2)       | -2.9<br>(1.0)        | -0.88<br>(-0.51)      |
| <b>1H<sup>-</sup></b>   | -6.6<br>(3.4)        | -3.6<br>(-14.1)      | -3.6<br>(-14.1)       |
| <b>2H<sup>-</sup></b>   | -5.5<br>(8.6)        | -3.3<br>(-9.9)       | -3.3<br>(-9.9)        |
| <b>1cAAC</b>            | -6.7<br>(2.9)        | -5.0<br>(-15.0)      | -5.0<br>(-15.3)       |
| <b>2cAAC</b>            | -6.1<br>(5.7)        | -4.7<br>(-12.5)      | -4.7<br>(-12.4)       |
| <b>1CO</b>              | -8.0<br>(-0.21)      | -5.8<br>(-17.8)      | -5.9<br>(-17.9)       |
| <b>2CO</b>              | -7.2<br>(2.9)        | -5.4<br>(-14.9)      | -5.4<br>(-14.9)       |
| <b>1NHC</b>             | -6.7<br>(3.8)        | -4.5<br>(-14.4)      | -4.5<br>(-14.4)       |
| <b>2NHC</b>             | -6.0<br>(7.1)        | -4.0<br>(-11.3)      | -4.0<br>(-11.3)       |
| <b>1PMe<sub>3</sub></b> | -7.2<br>(2.2)        | -4.8<br>(-15.8)      | -4.8<br>(-15.8)       |
| <b>2PMe<sub>3</sub></b> | -6.6<br>(5.4)        | -4.4<br>(-12.6)      | -4.4<br>(-12.6)       |

<sup>a</sup>NICS(0), NICS(1) and NICS(-1) represent NICS values at the center, 1 Å above the ring and 1 Å below the ring respectively. The dissected NICS(0)zz, NICS(1)zz and NICS(-1)zz are given in parentheses.

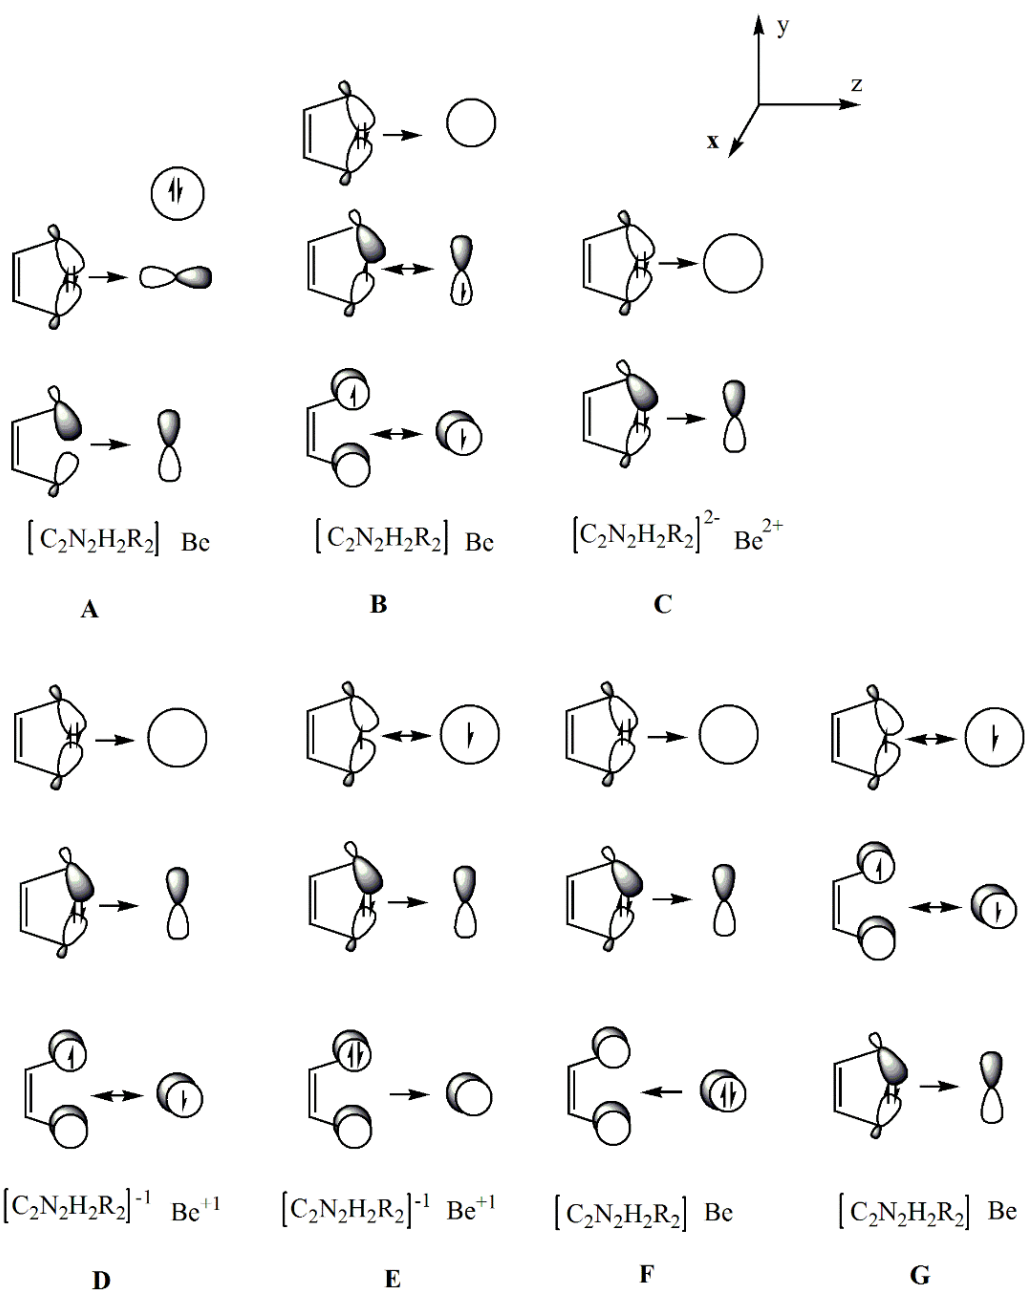

R = H, CH<sub>3</sub>

**Scheme S1.** Schematic representation of possible bonding possibilities for the interaction between beryllium and L (L = N<sub>2</sub>C<sub>2</sub>H<sub>4</sub> and N<sub>2</sub>C<sub>2</sub>H<sub>2</sub>(CH<sub>3</sub>)<sub>2</sub>) chosen for EDA-NOCV analysis. Double-headed arrow ( $\leftrightarrow$ ) indicates the electron-sharing interaction, and the single-headed arrow ( $\rightarrow$ ) indicates the donor-acceptor interaction between the fragments.

**Table S4.** EDA-NOCV results of different bonding situations for **Be-L** bonds of **1** and **2** in **Scheme S1** at the BP86/TZ2P level of theory. Energies are given in kcal/mol.

| Compound | Bonding       | $\Delta E_{\text{Int}}$ | $\Delta E_{\text{Pauli}}$ | $\Delta E_{\text{Elstat}}$ | $\Delta E_{\text{Orb}}$ |
|----------|---------------|-------------------------|---------------------------|----------------------------|-------------------------|
|          | Possibilities |                         |                           |                            |                         |
| <b>1</b> | <b>A</b>      | -130.9                  | 496.6                     | -277.9                     | -349.6                  |
|          | <b>B</b>      | -306.0                  | 250.4                     | -205.0                     | -351.3                  |
|          | <b>C</b>      | -878.5                  | 106.3                     | -688.1                     | -296.7                  |
|          | <b>D</b>      | -398.4                  | 98.3                      | -274.2                     | -222.5                  |
|          | <b>E</b>      | -394.4                  | 152.6                     | -275.7                     | -271.3                  |
|          | <b>F</b>      | -289.1                  | 116.1                     | -105.9                     | -299.3                  |
|          | <b>G</b>      | -246.6                  | 183.9                     | -123.6                     | -306.9                  |
| <b>2</b> | <b>A</b>      | -119.7                  | 510.2                     | -286.6                     | -343.3                  |
|          | <b>B</b>      | -319.2                  | 287.7                     | -234.7                     | -372.2                  |
|          | <b>C</b>      | -841.8                  | 104.2                     | -611.1                     | -334.9                  |
|          | <b>D</b>      | -388.2                  | 99.1                      | -256.7                     | -230.6                  |
|          | <b>E</b>      | -380.2                  | 165.3                     | -265.0                     | -280.5                  |
|          | <b>F</b>      | -277.9                  | 122.0                     | -108.8                     | -291.1                  |
|          | <b>G</b>      | -233.2                  | 201.2                     | -135.1                     | -299.2                  |

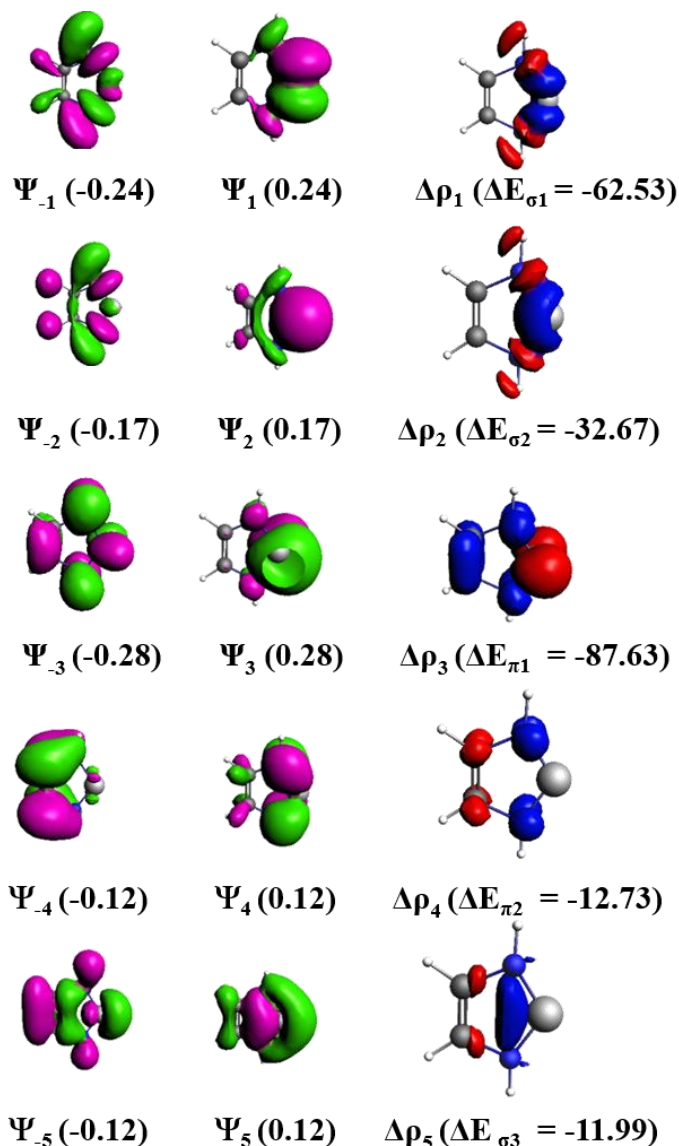

**Figure S3:** Plots of important alpha NOCV pair of orbitals  $\Psi_{-n}/\Psi_n$  of best bonding possibility in **1** with their eigenvalues in the parenthesis, the associated deformation densities  $\Delta\rho_n$  and the orbital stabilization energies  $\Delta E$  (kcal/mol) at the BP86/TZ2P level of theory. The direction of the charge flow in the deformation density plot  $\Delta\rho_n$  is from red→blue. The isosurface values for NOCV orbitals and deformation densities are 0.03 and 0.003, respectively.

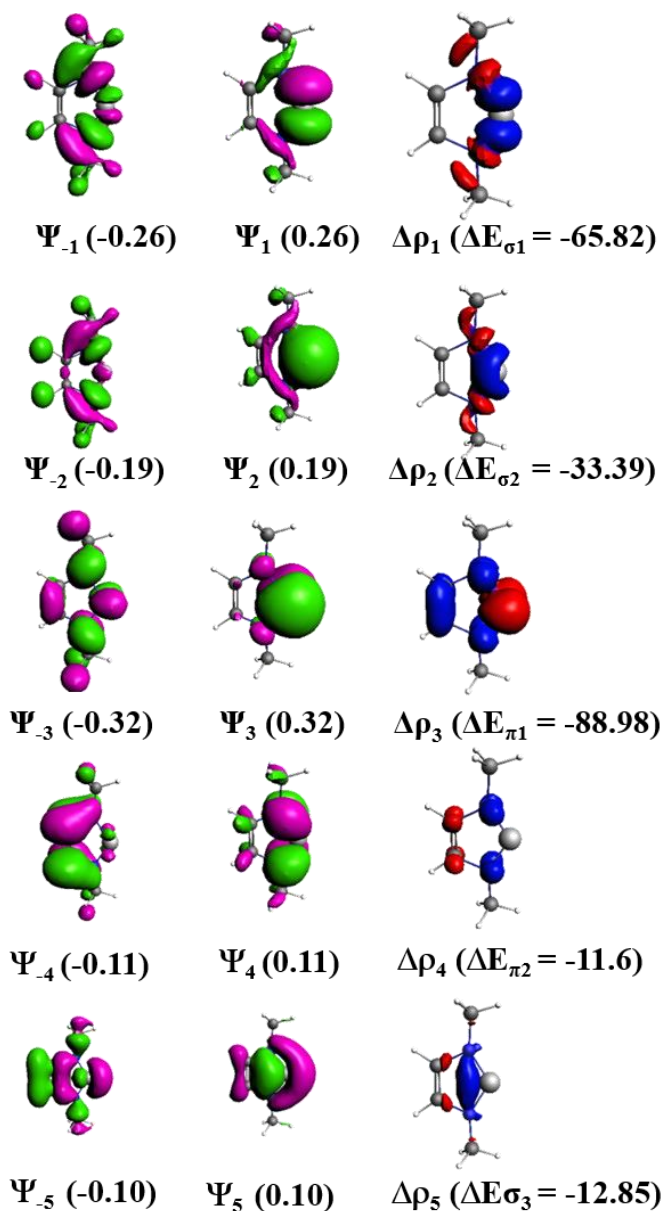

**Figure S4.** Plots of important alpha NOCV pair of orbitals  $\Psi_{-n}/\Psi_n$  of best bonding possibility in **2** with their eigenvalues in the parenthesis, the associated deformation densities  $\Delta\rho_n$  and the orbital stabilization energies  $\Delta E$  (kcal/mol) at the BP86/TZ2P level of theory. The direction of the charge flow in the deformation density plot  $\Delta\rho_n$  is from red→blue. The isosurface values for NOCV orbitals and deformation densities are 0.03 and 0.003, respectively.



**Table S5.** The vertical Electron Affinity (EA), and vertical Ionization Energy (IE) of **1** and **2** calculated at the M06/def2-TZVPP//BP86/def2-TZVPP level of theory. All values are given in kcal/mol.

| Compounds                   | 1     | 2     |
|-----------------------------|-------|-------|
| 1 <sup>st</sup> vertical EA | 2.4   | 0.1   |
| 2 <sup>nd</sup> vertical EA | 106.1 | 98.8  |
| 1 <sup>st</sup> vertical IE | 155.4 | 148.9 |
| 2 <sup>nd</sup> vertical IE | 477.9 | 446.7 |

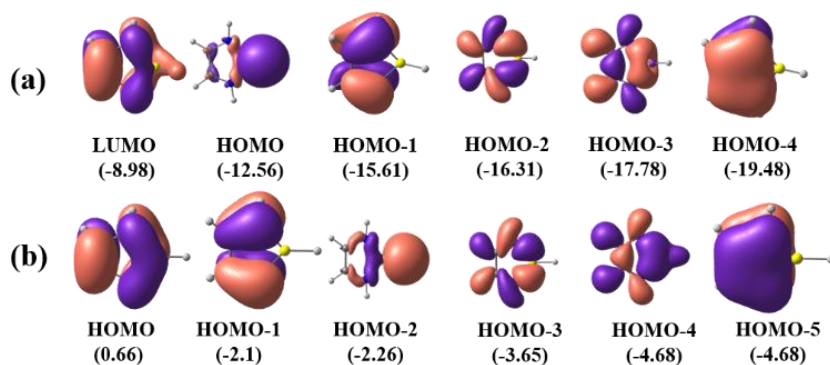

**Figure S5.** Important MOs of (a) **1H<sup>+</sup>** and (b) **1H<sup>-</sup>** calculated at the M06/def2-TZVPP//BP86/def2-TZVPP level of theory. Eigenvalues are given in eV.

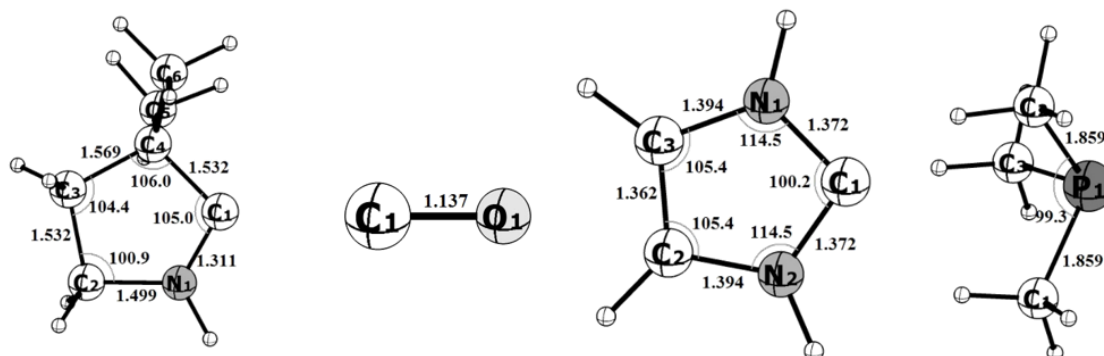

**Figure S6.** Optimized geometries of cAAC, CO, NHC, and PMe<sub>3</sub> at the BP86/def2-TZVPP level of theory.

**Table S6.** Wiberg bond index of important bonds of **1**, **2**, **1CO**, **2CO**, **1PMe<sub>3</sub>**, **2PMe<sub>3</sub>**, **1NHC**, **2NHC**, **1cAAC**, **2cAAC**, **1H<sup>+</sup>**, **2H<sup>+</sup>**, **1H<sup>-</sup>** and **2H<sup>-</sup>** of adducts at the M06/def2-TZVPP//BP86/def2-TZVPP level of theory. A = CO, PMe<sub>3</sub>, NHC and cAAC.

| Compounds               | Wiberg Bond Index |       |       |       |       |      |
|-------------------------|-------------------|-------|-------|-------|-------|------|
|                         | Be-N1             | Be-N2 | N1-C1 | N2-C2 | C1-C2 | Be-A |
| <b>1</b>                | 0.65              | 0.65  | 1.12  | 1.12  | 1.72  |      |
| <b>2</b>                | 0.61              | 0.61  | 1.1   | 1.1   | 1.72  |      |
| <b>1CO</b>              | 0.69              | 0.69  | 1.26  | 1.26  | 1.53  | 0.74 |
| <b>2CO</b>              | 0.64              | 0.64  | 1.24  | 1.24  | 1.52  | 0.76 |
| <b>1PMe<sub>3</sub></b> | 0.69              | 0.69  | 1.17  | 1.17  | 1.66  | 0.62 |
| <b>2PMe<sub>3</sub></b> | 0.63              | 0.63  | 1.15  | 1.15  | 1.66  | 0.62 |
| <b>1NHC</b>             | 0.67              | 0.67  | 1.19  | 1.19  | 1.63  | 0.6  |
| <b>2NHC</b>             | 0.61              | 0.61  | 1.16  | 1.16  | 1.63  | 0.6  |
| <b>1cAAC</b>            | 0.63              | 0.63  | 1.23  | 1.23  | 1.56  | 0.61 |
| <b>2cAAC</b>            | 0.56              | 0.58  | 1.21  | 1.21  | 1.56  | 0.6  |
| <b>1H<sup>+</sup></b>   | 0.35              | 0.35  | 1.85  | 1.85  | 1.02  | 0.84 |
| <b>2H<sup>+</sup></b>   | 0.31              | 0.31  | 1.80  | 1.80  | 1.03  | 0.85 |
| <b>1H<sup>-</sup></b>   | 0.59              | 0.59  | 1.16  | 1.16  | 1.65  | 0.78 |
| <b>2H<sup>-</sup></b>   | 0.53              | 0.53  | 1.14  | 1.14  | 1.66  | 0.79 |

**Table S7.** The contribution of different configurational state of compounds **1** and **2** at the CASSCF [6,6]/def2-TZVPP//BP86/def2-TZVPP level of theory.

|          |                                                                             |                                                                            |                                                                                                          |                                                                            |
|----------|-----------------------------------------------------------------------------|----------------------------------------------------------------------------|----------------------------------------------------------------------------------------------------------|----------------------------------------------------------------------------|
| <b>1</b> | 96.04%<br>(1 $\pi^2$ 2 $\pi^2$ 3 $\pi^2$ 4 $\pi^0$ 1 $\sigma^0$ 5 $\pi^0$ ) | 3.24%<br>(1 $\pi^0$ 2 $\pi^2$ 3 $\pi^2$ 4 $\pi^0$ 1 $\sigma^0$ 5 $\pi^2$ ) | 0.36%<br>(1 $\pi^2$ 2 $\pi^{1\alpha}$ 3 $\pi^{1\beta}$ 4 $\pi^{1\alpha}$ 1 $\sigma^0$ 5 $\pi^{1\beta}$ ) | 0.36%<br>(1 $\pi^2$ 2 $\pi^0$ 3 $\pi^2$ 4 $\pi^2$ 1 $\sigma^0$ 5 $\pi^0$ ) |
| <b>2</b> | 96.04%<br>(1 $\pi^2$ 2 $\pi^2$ 3 $\pi^2$ 1 $\sigma^0$ 4 $\pi^0$ 5 $\pi^0$ ) | 3.24%<br>(1 $\pi^2$ 2 $\pi^2$ 3 $\pi^0$ 1 $\sigma^0$ 4 $\pi^0$ 5 $\pi^2$ ) | 0.36%<br>(1 $\pi^{1\alpha}$ 2 $\pi^{1\beta}$ 3 $\pi^2$ 1 $\sigma^0$ 4 $\pi^{1\alpha}$ 5 $\pi^{1\beta}$ ) | 0.36%<br>(1 $\pi^2$ 2 $\pi^0$ 3 $\pi^2$ 1 $\sigma^0$ 4 $\pi^2$ 5 $\pi^0$ ) |

**Table S8.** Hirshfeld charge analysis at the M06/def2-TZVPP//BP86/def2-TZVPP level of theory.

| Compounds | Charge |       |       |
|-----------|--------|-------|-------|
|           | Be     | C1/C2 | N1/N2 |
| 1         | 0.42   | -0.02 | -0.2  |
| 2         | 0.42   | -0.01 | -0.3  |

**Table S9.** Comparison of proton affinity (PA), hydride affinity (HA), and reaction energies of **1** using ‘fine’ grid and ‘ultrafine’ grid at the M06/def2-TZVPP//BP86/def2-TZVPP level of theory.

| Compounds                            | Grid = fine | Grid = ultrafine |
|--------------------------------------|-------------|------------------|
| PA <sup>a</sup>                      | 215.7       | 215.7            |
| HA <sup>b</sup>                      | 92.9        | 93.0             |
| $\Delta E_{\text{cAAC}}^{\text{c}}$  | -56.3       | -56.3            |
| $\Delta E_{\text{CO}}^{\text{c}}$    | -26.5       | -26.6            |
| $\Delta E_{\text{NHC}}^{\text{c}}$   | -51.2       | -51.2            |
| $\Delta E_{\text{PMe}_3}^{\text{c}}$ | -32.6       | -32.6            |

<sup>a</sup>PA is the proton affinity. <sup>b</sup>HA is the hydride affinity.  $\Delta E_{\text{cAAC}}$ ,  $\Delta E_{\text{CO}}$ ,  $\Delta E_{\text{NHC}}$  and  $\Delta E_{\text{PMe}_3}$  are the reaction energies of **1** and **2** with cAAC, CO, NHC, and PMe<sub>3</sub>.

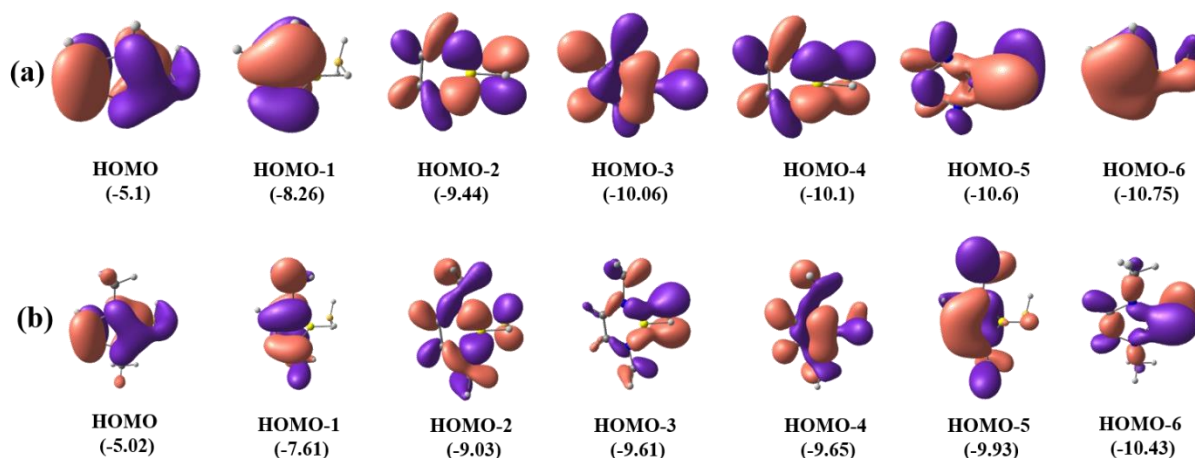**Figure S7.** Important MOs of (a) **1BH<sub>3</sub>** and (b) **2BH<sub>3</sub>** calculated at the M06/def2-TZVPP//BP86/def2-TZVPP level of theory. Eigenvalues are given in eV.

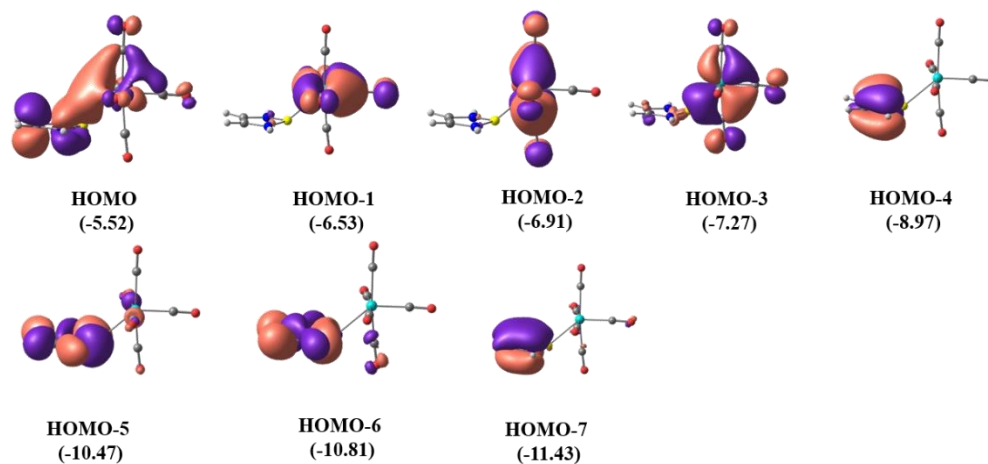

**Figure S8.** Important MOs of 1-W(CO)<sub>5</sub> calculated at the M06/def2-TZVPP//BP86/def2-TZVPP level of theory. Eigenvalues are given in eV.

### Cartesian coordinates of molecules

1

Electronic energy (BP86) = -202.891294

Zero-point correction (BP86) = 0.064739

Thermal correction to Gibbs free energy (BP86) = 0.038488

Electronic energy (M06) = -202.825961

|   |             |              |              |
|---|-------------|--------------|--------------|
| 6 | 0.000000000 | 0.682810000  | -0.808083000 |
| 6 | 0.000000000 | -0.682810000 | -0.808083000 |
| 7 | 0.000000000 | 1.274859000  | 0.480796000  |
| 1 | 0.000000000 | 1.302010000  | -1.702779000 |
| 7 | 0.000000000 | -1.274859000 | 0.480796000  |
| 1 | 0.000000000 | -1.302010000 | -1.702779000 |
| 4 | 0.000000000 | 0.000000000  | 1.330500000  |
| 1 | 0.000000000 | 2.283205000  | 0.524707000  |
| 1 | 0.000000000 | -2.283205000 | 0.524707000  |

1'

Electronic energy (BP86) = -202.863222

Zero-point correction (BP86) = 0.065628

Thermal correction to Gibbs free energy (BP86) = 0.037938

Electronic energy (M06) = -202.7856256

|   |              |              |             |
|---|--------------|--------------|-------------|
| 6 | 0.000000000  | 1.076609000  | 0.000000000 |
| 6 | -1.067647000 | 0.138897000  | 0.000000000 |
| 7 | 1.204165000  | 0.494364000  | 0.000000000 |
| 1 | -0.152316000 | 2.157910000  | 0.000000000 |
| 7 | -0.645624000 | -1.130298000 | 0.000000000 |
| 1 | -2.120273000 | 0.429465000  | 0.000000000 |
| 4 | 1.027007000  | -1.169152000 | 0.000000000 |
| 1 | 2.016045000  | 1.104251000  | 0.000000000 |
| 1 | -1.355392000 | -1.856512000 | 0.000000000 |

**2**

Electronic energy (BP86) = -281.470513

Zero-point correction (BP86) = 0.118230

Thermal correction to Gibbs free energy (BP86) = 0.086779

Electronic energy (M06) = -281.3959718

|   |             |              |              |
|---|-------------|--------------|--------------|
| 6 | 0.000000000 | 0.684551000  | -0.986475000 |
| 6 | 0.000000000 | -0.684551000 | -0.986475000 |
| 7 | 0.000000000 | 1.293382000  | 0.290735000  |
| 1 | 0.000000000 | 1.301940000  | -1.884476000 |
| 7 | 0.000000000 | -1.293382000 | 0.290735000  |
| 1 | 0.000000000 | -1.301940000 | -1.884476000 |
| 4 | 0.000000000 | 0.000000000  | 1.116532000  |
| 6 | 0.000000000 | -2.735956000 | 0.382189000  |
| 1 | 0.000000000 | -3.048853000 | 1.435235000  |

|   |              |              |              |
|---|--------------|--------------|--------------|
| 1 | -0.891041000 | -3.181341000 | -0.096631000 |
| 1 | 0.891041000  | -3.181341000 | -0.096631000 |
| 6 | 0.000000000  | 2.735956000  | 0.382189000  |
| 1 | -0.891041000 | 3.181341000  | -0.096631000 |
| 1 | 0.000000000  | 3.048853000  | 1.435235000  |
| 1 | 0.891041000  | 3.181341000  | -0.096631000 |

**2'**

Electronic energy (BP86) = -281.448552

Zero-point correction (BP86) = 0.118349

Thermal correction to Gibbs free energy (BP86) = 0.083748

Electronic energy (M06) = -281.3593804

|   |              |              |              |
|---|--------------|--------------|--------------|
| 6 | -0.708501000 | 1.002007000  | -0.000084000 |
| 6 | 0.708501000  | 1.002007000  | 0.000068000  |
| 7 | -1.251647000 | -0.220963000 | -0.000257000 |
| 1 | -1.310629000 | 1.914946000  | -0.000165000 |
| 7 | 1.251648000  | -0.220960000 | 0.000085000  |
| 1 | 1.310627000  | 1.914948000  | 0.000112000  |
| 4 | -0.000001000 | -1.330182000 | -0.000166000 |
| 6 | 2.693454000  | -0.393790000 | 0.000042000  |
| 1 | 3.009907000  | -0.964833000 | -0.886237000 |
| 1 | 3.216809000  | 0.574776000  | 0.001322000  |
| 1 | 3.009614000  | -0.967102000 | 0.884939000  |
| 6 | -2.693455000 | -0.393789000 | 0.000138000  |
| 1 | -3.216805000 | 0.574764000  | -0.005316000 |
| 1 | -3.009253000 | -0.970780000 | -0.882462000 |
| 1 | -3.010269000 | -0.961137000 | 0.888690000  |

**1cAAC**

Electronic energy (BP86) = -492.885250

Zero-point correction (BP86) = 0.224512

Thermal correction to Gibbs free energy (BP86) = 0.185020

Electronic energy (M06) = -492.7524355

|   |              |              |              |
|---|--------------|--------------|--------------|
| 6 | 3.611500000  | 0.652576000  | 0.025131000  |
| 6 | 3.464346000  | -0.723032000 | 0.009956000  |
| 7 | 2.409068000  | 1.322857000  | -0.006347000 |
| 1 | 4.570968000  | 1.169476000  | 0.057575000  |
| 7 | 2.147653000  | -1.120492000 | -0.035423000 |
| 1 | 4.292383000  | -1.431949000 | 0.030208000  |
| 4 | 1.233286000  | 0.210454000  | -0.050806000 |
| 6 | -0.478680000 | 0.416628000  | -0.066214000 |
| 7 | -1.105154000 | 1.598356000  | -0.065103000 |
| 6 | -2.575264000 | 1.581081000  | -0.007682000 |
| 6 | -2.873707000 | 0.127136000  | -0.392964000 |
| 1 | -0.588939000 | 2.472924000  | -0.020776000 |
| 1 | -3.765762000 | -0.268020000 | 0.110701000  |
| 1 | -2.921642000 | 1.832160000  | 1.010274000  |
| 1 | -3.038984000 | 0.057216000  | -1.478365000 |
| 1 | -3.003317000 | 2.320067000  | -0.700395000 |
| 6 | -1.576053000 | -0.650341000 | -0.011020000 |
| 1 | 2.480022000  | 2.334867000  | 0.002900000  |
| 1 | 1.994787000  | -2.123075000 | -0.048831000 |
| 6 | -1.656508000 | -1.172946000 | 1.444690000  |
| 1 | -2.447259000 | -1.935190000 | 1.528750000  |
| 1 | -0.701071000 | -1.622215000 | 1.746940000  |
| 1 | -1.883086000 | -0.364166000 | 2.155260000  |

|   |              |              |              |
|---|--------------|--------------|--------------|
| 6 | -1.308637000 | -1.819758000 | -0.969488000 |
| 1 | -0.381681000 | -2.343332000 | -0.701140000 |
| 1 | -2.136045000 | -2.545560000 | -0.930403000 |
| 1 | -1.206463000 | -1.468129000 | -2.005823000 |

## 2cAAC

Electronic energy (BP86) = -571.463811

Zero-point correction (BP86) = 0.277284

Thermal correction to Gibbs free energy (BP86) = 0.233856

Electronic energy (M06) = -571.3242011

|   |              |              |              |
|---|--------------|--------------|--------------|
| 6 | 3.265943000  | 0.582880000  | 0.053601000  |
| 6 | 3.159940000  | -0.792743000 | -0.046924000 |
| 7 | 2.054906000  | 1.229521000  | 0.074251000  |
| 1 | 4.210373000  | 1.126140000  | 0.130401000  |
| 7 | 1.864962000  | -1.252563000 | -0.083110000 |
| 1 | 4.012244000  | -1.473825000 | -0.092829000 |
| 4 | 0.922220000  | 0.065183000  | -0.014321000 |
| 6 | -0.780259000 | 0.350120000  | -0.047986000 |
| 7 | -1.290531000 | 1.562414000  | -0.302770000 |
| 6 | -2.756040000 | 1.689937000  | -0.310553000 |
| 6 | -3.175588000 | 0.389824000  | 0.384779000  |
| 1 | -0.692747000 | 2.343726000  | -0.560311000 |
| 1 | -3.300808000 | 0.569460000  | 1.462812000  |
| 1 | -3.074305000 | 2.598357000  | 0.221164000  |
| 1 | -4.122333000 | -0.009655000 | -0.002369000 |
| 1 | -3.127059000 | 1.759552000  | -1.348159000 |
| 6 | -1.977083000 | -0.583415000 | 0.153785000  |
| 6 | -1.785947000 | -1.535104000 | 1.343634000  |



|   |              |              |              |
|---|--------------|--------------|--------------|
| 1 | -2.674423000 | -2.172620000 | 1.474465000  |
| 1 | -0.915126000 | -2.186667000 | 1.193369000  |
| 1 | -1.624829000 | -0.973699000 | 2.275001000  |
| 6 | -2.177461000 | -1.393841000 | -1.150126000 |
| 1 | -1.290605000 | -2.001469000 | -1.374265000 |
| 1 | -3.043548000 | -2.066730000 | -1.048484000 |
| 1 | -2.354321000 | -0.734921000 | -2.013115000 |
| 6 | 2.047155000  | 2.672793000  | 0.185054000  |
| 1 | 2.152638000  | 3.177149000  | -0.795674000 |
| 1 | 1.104805000  | 3.020632000  | 0.639734000  |
| 1 | 2.865568000  | 3.042754000  | 0.828241000  |
| 6 | 1.670436000  | -2.682259000 | -0.224877000 |
| 1 | 0.598896000  | -2.923502000 | -0.242742000 |
| 1 | 2.110367000  | -3.072800000 | -1.161503000 |
| 1 | 2.124389000  | -3.247377000 | 0.610638000  |

## 1CO

Electronic energy (BP86) = -316.304770

Zero-point correction (BP86) = 0.074186

Thermal correction to Gibbs free energy (BP86) = 0.043174

Electronic energy (M06) = -316.1738023

|   |              |              |              |
|---|--------------|--------------|--------------|
| 6 | 1.925458000  | 0.693650000  | -0.000211000 |
| 6 | 1.925520000  | -0.693586000 | -0.000346000 |
| 7 | 0.663209000  | 1.232098000  | 0.000244000  |
| 1 | 2.823396000  | 1.310745000  | -0.000432000 |
| 7 | 0.663303000  | -1.232114000 | 0.000079000  |
| 1 | 2.823495000  | -1.310626000 | -0.000653000 |
| 4 | -0.346505000 | -0.000057000 | 0.000641000  |

|   |              |              |              |
|---|--------------|--------------|--------------|
| 1 | 0.599666000  | 2.243947000  | 0.000721000  |
| 1 | 0.599847000  | -2.243964000 | 0.000525000  |
| 6 | -2.045208000 | 0.000009000  | -0.000268000 |
| 8 | -3.197573000 | -0.000025000 | -0.000005000 |

## 2CO

Electronic energy (BP86) = -394.885641

Zero-point correction (BP86) = 0.127193

Thermal correction to Gibbs free energy (BP86) = 0.091190

Electronic energy (M06) = -394.745215

|   |              |              |              |
|---|--------------|--------------|--------------|
| 6 | -1.787243000 | -0.687231000 | -0.000177000 |
| 6 | -1.781660000 | 0.701463000  | 0.000192000  |
| 7 | -0.538257000 | -1.248287000 | -0.000653000 |
| 1 | -2.691133000 | -1.298989000 | -0.000305000 |
| 7 | -0.528191000 | 1.252455000  | 0.000310000  |
| 1 | -2.680592000 | 1.320486000  | 0.000139000  |
| 4 | 0.462358000  | -0.001925000 | -0.000521000 |
| 6 | 2.155612000  | -0.008572000 | 0.000266000  |
| 8 | 3.309792000  | -0.012995000 | -0.000098000 |
| 6 | -0.413910000 | -2.695482000 | 0.000345000  |
| 1 | 0.645650000  | -2.981076000 | -0.004975000 |
| 1 | -0.880303000 | -3.144502000 | 0.894359000  |
| 1 | -0.889885000 | -3.146381000 | -0.887606000 |
| 6 | -0.392211000 | 2.698594000  | 0.000000000  |
| 1 | -0.863746000 | 3.152830000  | 0.888637000  |
| 1 | 0.669616000  | 2.975667000  | 0.004615000  |
| 1 | -0.855768000 | 3.151821000  | -0.893349000 |

## 1NHC

Electronic energy (BP86) = -429.181694

Zero-point correction (BP86) = 0.137454

Thermal correction to Gibbs free energy (BP86) = 0.101618

Electronic energy (M06) = -429.0159452

|   |              |              |              |
|---|--------------|--------------|--------------|
| 6 | -3.125697000 | -0.685739000 | 0.049367000  |
| 6 | -3.125963000 | 0.685385000  | -0.049633000 |
| 7 | -1.847588000 | -1.230625000 | 0.083449000  |
| 1 | -4.022586000 | -1.303287000 | 0.100148000  |
| 7 | -1.848073000 | 1.230791000  | -0.083298000 |
| 1 | -4.023091000 | 1.302561000  | -0.100724000 |
| 4 | -0.824682000 | 0.000314000  | 0.000276000  |
| 1 | -1.811058000 | -2.239003000 | 0.180106000  |
| 1 | -1.811885000 | 2.239206000  | -0.179681000 |
| 6 | 0.911875000  | 0.000305000  | 0.000164000  |
| 7 | 1.774766000  | 1.063076000  | 0.091506000  |
| 7 | 1.774248000  | -1.062877000 | -0.091412000 |
| 6 | 3.107153000  | -0.679126000 | -0.058420000 |
| 6 | 3.107491000  | 0.678700000  | 0.058141000  |
| 1 | 1.445462000  | 2.016113000  | 0.184744000  |
| 1 | 1.444443000  | -2.015744000 | -0.184620000 |
| 1 | 3.927747000  | 1.382714000  | 0.119250000  |
| 1 | 3.927066000  | -1.383521000 | -0.119758000 |

## **2NHC**

Electronic energy (BP86) = -507.761771

Zero-point correction (BP86) = 0.190033

Thermal correction to Gibbs free energy (BP86) = 0.149686

Electronic energy (M06) = -507.5884233

|   |              |              |              |
|---|--------------|--------------|--------------|
| 6 | 2.790711000  | 0.688084000  | -0.022969000 |
| 6 | 2.791081000  | -0.687220000 | 0.024034000  |
| 7 | 1.522429000  | 1.247279000  | -0.041205000 |
| 1 | 3.689115000  | 1.307942000  | -0.048527000 |
| 7 | 1.523121000  | -1.247135000 | 0.040611000  |
| 1 | 3.689819000  | -1.306554000 | 0.050534000  |
| 4 | 0.511987000  | -0.000259000 | -0.000943000 |
| 6 | -1.223400000 | -0.000283000 | -0.000490000 |
| 7 | -2.086173000 | -1.050668000 | -0.189844000 |
| 7 | -2.085876000 | 1.050209000  | 0.189546000  |
| 6 | -3.418420000 | 0.670586000  | 0.120860000  |
| 6 | -3.418614000 | -0.670884000 | -0.119966000 |
| 1 | -1.756375000 | -1.990636000 | -0.373955000 |
| 1 | -1.755782000 | 1.990098000  | 0.373546000  |
| 1 | -4.238708000 | -1.366457000 | -0.245487000 |
| 1 | -4.238311000 | 1.366266000  | 0.247110000  |
| 6 | 1.418530000  | 2.688255000  | -0.091511000 |
| 1 | 0.376620000  | 2.993754000  | -0.281487000 |
| 1 | 1.737108000  | 3.176132000  | 0.850907000  |
| 1 | 2.028683000  | 3.125669000  | -0.904728000 |
| 6 | 1.419861000  | -2.688160000 | 0.091265000  |
| 1 | 2.028453000  | -3.124899000 | 0.906013000  |
| 1 | 0.377685000  | -2.994102000 | 0.279012000  |
| 1 | 1.740751000  | -3.176242000 | -0.850251000 |

### **1PMe<sub>3</sub>**

Electronic energy (BP86) = -664.029896

Zero-point correction (BP86) = 0.176863

Thermal correction to Gibbs free energy (BP86) = 0.136836

Electronic energy (M06) = -663.9172583

|    |              |              |              |
|----|--------------|--------------|--------------|
| 6  | 3.098431000  | -0.685454000 | 0.006057000  |
| 6  | 3.084901000  | 0.685375000  | 0.004865000  |
| 7  | 1.821116000  | -1.247715000 | 0.010640000  |
| 1  | 3.999044000  | -1.299014000 | 0.001457000  |
| 7  | 1.795754000  | 1.220850000  | 0.008428000  |
| 1  | 3.972707000  | 1.317204000  | -0.000757000 |
| 4  | 0.813083000  | -0.023527000 | 0.014368000  |
| 1  | 1.784569000  | -2.259843000 | 0.010106000  |
| 1  | 1.738041000  | 2.232046000  | 0.005789000  |
| 15 | -1.304544000 | -0.006034000 | 0.003311000  |
| 6  | -2.092227000 | -1.123449000 | -1.227939000 |
| 1  | -1.763250000 | -2.154151000 | -1.039964000 |
| 1  | -3.189740000 | -1.079546000 | -1.176959000 |
| 1  | -1.759980000 | -0.841588000 | -2.235363000 |
| 6  | -2.147081000 | -0.480443000 | 1.571838000  |
| 1  | -1.831782000 | 0.203631000  | 2.370520000  |
| 1  | -3.242489000 | -0.451725000 | 1.475518000  |
| 1  | -1.833861000 | -1.494475000 | 1.853882000  |
| 6  | -2.016149000 | 1.643877000  | -0.377737000 |
| 1  | -1.663024000 | 2.369217000  | 0.366974000  |
| 1  | -1.664878000 | 1.969223000  | -1.365316000 |
| 1  | -3.114868000 | 1.622263000  | -0.369000000 |

### **2PMe<sub>3</sub>**

Electronic Energy (BP86) = -742.608516

Zero-point correction (BP86) = 0.229768

Thermal correction to Gibbs free energy (BP86) = 0.186238

Electronic energy (M06) = -742.4892622

|    |              |              |              |
|----|--------------|--------------|--------------|
| 6  | 2.787550000  | -0.685850000 | 0.009379000  |
| 6  | 2.787214000  | 0.686500000  | 0.009299000  |
| 7  | 1.515377000  | -1.250432000 | -0.005015000 |
| 1  | 3.683868000  | -1.308510000 | 0.014959000  |
| 7  | 1.514756000  | 1.250482000  | -0.005222000 |
| 1  | 3.683224000  | 1.309604000  | 0.014874000  |
| 4  | 0.531372000  | -0.000247000 | -0.016898000 |
| 6  | 1.418349000  | -2.694312000 | 0.001777000  |
| 1  | 1.866324000  | -3.142976000 | 0.909263000  |
| 1  | 0.364194000  | -3.007124000 | -0.029482000 |
| 1  | 1.922252000  | -3.154209000 | -0.869897000 |
| 6  | 1.417205000  | 2.694324000  | 0.001901000  |
| 1  | 0.362963000  | 3.006785000  | -0.029599000 |
| 1  | 1.864783000  | 3.142923000  | 0.909614000  |
| 1  | 1.921193000  | 3.154606000  | -0.869524000 |
| 15 | -1.591335000 | -0.000200000 | -0.002244000 |
| 6  | -2.370989000 | 1.447851000  | -0.824823000 |
| 1  | -3.467985000 | 1.392735000  | -0.776674000 |
| 1  | -2.036484000 | 2.370400000  | -0.332438000 |
| 1  | -2.051763000 | 1.487138000  | -1.874090000 |
| 6  | -2.371901000 | -1.442771000 | -0.833633000 |
| 1  | -2.053676000 | -1.475072000 | -1.883452000 |
| 1  | -2.036803000 | -2.368561000 | -0.347765000 |
| 1  | -3.468868000 | -1.388066000 | -0.784080000 |
| 6  | -2.397728000 | -0.005236000 | 1.655445000  |

|   |              |              |             |
|---|--------------|--------------|-------------|
| 1 | -2.070748000 | 0.880041000  | 2.216663000 |
| 1 | -3.495103000 | -0.004271000 | 1.577964000 |
| 1 | -2.071964000 | -0.894841000 | 2.210500000 |

### **1H<sup>+</sup>**

Electronic Energy (BP86) = -203.233452

Zero-point correction (BP86) = 0.073589

Thermal correction to Gibbs free energy (BP86) = 0.046273

Electronic energy (M06) = -203.1785046

|   |              |              |              |
|---|--------------|--------------|--------------|
| 6 | 0.748489000  | -0.859882000 | 0.053390000  |
| 6 | -0.749162000 | -0.859322000 | 0.053362000  |
| 7 | 1.249482000  | 0.314494000  | -0.108135000 |
| 1 | 1.332598000  | -1.774296000 | 0.194175000  |
| 7 | -1.249333000 | 0.315465000  | -0.107813000 |
| 1 | -1.334009000 | -1.773391000 | 0.193313000  |
| 4 | 0.000421000  | 1.490425000  | 0.014950000  |
| 1 | 2.269809000  | 0.405019000  | -0.107418000 |
| 1 | -2.269609000 | 0.406537000  | -0.107650000 |
| 1 | 0.002521000  | 2.679936000  | 0.638898000  |

### **2H<sup>+</sup>**

Electronic energy (BP86) = -281.843028

Zero-point correction (BP86) = 0.126816

Thermal correction to Gibbs free energy (BP86) = 0.094774

Electronic energy (M06) = -281.777054

|   |              |              |             |
|---|--------------|--------------|-------------|
| 6 | 0.744357000  | -1.046601000 | 0.000059000 |
| 6 | -0.744361000 | -1.046592000 | 0.000035000 |
| 7 | 1.274187000  | 0.125910000  | 0.000005000 |
| 1 | 1.323973000  | -1.976499000 | 0.000088000 |

|   |              |              |              |
|---|--------------|--------------|--------------|
| 7 | -1.274184000 | 0.125923000  | 0.000012000  |
| 1 | -1.323988000 | -1.976483000 | -0.000089000 |
| 4 | -0.000005000 | 1.312002000  | 0.000093000  |
| 1 | 0.000071000  | 2.646513000  | 0.000186000  |
| 6 | 2.711430000  | 0.350843000  | -0.000057000 |
| 1 | 3.276540000  | -0.589210000 | 0.000256000  |
| 1 | 2.969893000  | 0.955431000  | -0.882242000 |
| 1 | 2.969884000  | 0.956108000  | 0.881650000  |
| 6 | -2.711435000 | 0.350846000  | -0.000076000 |
| 1 | -2.969751000 | 0.956522000  | -0.881538000 |
| 1 | -3.276531000 | -0.589215000 | -0.000929000 |
| 1 | -2.970046000 | 0.955008000  | 0.882360000  |

### 1H

Electronic energy (BP86) = -203.552279

Zero-point correction (BP86) = 0.069681

Thermal correction to Gibbs free energy (BP86) = 0.042524

Electronic energy (M06) = -203.4812337

|   |              |              |             |
|---|--------------|--------------|-------------|
| 6 | 0.000000000  | 1.148306000  | 0.000000000 |
| 6 | -1.100031000 | 0.329548000  | 0.000000000 |
| 7 | 1.203978000  | 0.433659000  | 0.000000000 |
| 1 | -0.038293000 | 2.241767000  | 0.000000000 |
| 7 | -0.760924000 | -1.028925000 | 0.000000000 |
| 1 | -2.136465000 | 0.680133000  | 0.000000000 |
| 4 | 0.863874000  | -1.160533000 | 0.000000000 |
| 1 | 2.048335000  | 0.995043000  | 0.000000000 |
| 1 | -1.540953000 | -1.676704000 | 0.000000000 |
| 1 | 1.710682000  | -2.298372000 | 0.000000000 |



## 2H

Electronic energy (BP86) = -282.138338

Zero-point correction (BP86) = 0.122223

Thermal correction to Gibbs free energy (BP86) = 0.090397

Electronic energy (M06) = -282.058914

|   |              |              |              |
|---|--------------|--------------|--------------|
| 6 | -0.686368000 | -1.072778000 | 0.000007000  |
| 6 | 0.686368000  | -1.072778000 | -0.000007000 |
| 7 | -1.239596000 | 0.207512000  | 0.000013000  |
| 1 | -1.311915000 | -1.971690000 | 0.000010000  |
| 7 | 1.239596000  | 0.207512000  | -0.000013000 |
| 1 | 1.311915000  | -1.971690000 | -0.000010000 |
| 4 | 0.000000000  | 1.268850000  | 0.000000000  |
| 6 | 2.670401000  | 0.327376000  | 0.000003000  |
| 1 | 2.952882000  | 1.391974000  | -0.000031000 |
| 1 | 3.155418000  | -0.139377000 | 0.890406000  |
| 1 | 3.155438000  | -0.139440000 | -0.890356000 |
| 6 | -2.670401000 | 0.327376000  | -0.000003000 |
| 1 | -3.155438000 | -0.139440000 | 0.890357000  |
| 1 | -2.952882000 | 1.391974000  | 0.000031000  |
| 1 | -3.155418000 | -0.139377000 | -0.890406000 |
| 1 | 0.000000000  | 2.681322000  | 0.000000000  |

**1BH<sub>3</sub>**

Electronic energy (BP86) = -229.523923

Zero-point correction (BP86) = 0.095681

Thermal correction to Gibbs free energy (BP86) = 0.065075

Electronic energy (M06) = -229.4584645

6 0.267792000 -1.379882000 0.698786000

6 0.267792000 -1.379882000 -0.698786000

7 0.267792000 -0.127953000 1.228982000

1 0.209028000 -2.279438000 1.311046000

7 0.267792000 -0.127953000 -1.228982000

1 0.209028000 -2.279438000 -1.311046000

4 0.162796000 0.890906000 0.000000000

1 0.226360000 -0.056808000 2.240538000

1 0.226360000 -0.056808000 -2.240538000

5 -1.101057000 2.363653000 0.000000000

1 -1.581892000 2.638480000 -1.059422000

1 -1.581892000 2.638480000 1.059422000

1 0.184525000 2.363564000 0.000000000

**2BH<sub>3</sub>**

Electronic energy (BP86) = -308.107318

Zero-point correction (BP86) = 0.148545

Thermal correction to Gibbs free energy (BP86) = 0.113083

Electronic energy (M06) = -308.0326213

6 0.699903000 -1.371970000 -0.252015000

6 -0.700551000 -1.371713000 -0.251989000

|   |              |              |              |
|---|--------------|--------------|--------------|
| 7 | 1.248630000  | -0.195632000 | 0.135645000  |
| 1 | 1.309795000  | -2.206859000 | -0.603201000 |
| 7 | -1.248894000 | -0.195180000 | 0.135599000  |
| 1 | -1.310766000 | -2.206453000 | -0.602972000 |
| 4 | 0.000045000  | 0.796190000  | 0.339878000  |
| 5 | 0.001063000  | 2.572366000  | -0.375686000 |
| 1 | 0.001378000  | 2.178831000  | 0.852299000  |
| 1 | 1.058642000  | 3.002716000  | -0.736138000 |
| 1 | -1.056988000 | 3.001812000  | -0.735940000 |
| 6 | 2.693559000  | -0.049572000 | 0.186952000  |
| 1 | 3.102039000  | -0.484713000 | 1.114665000  |
| 1 | 3.182910000  | -0.546581000 | -0.666073000 |
| 1 | 2.957674000  | 1.014784000  | 0.165026000  |
| 6 | -2.693762000 | -0.048619000 | 0.186901000  |
| 1 | -3.183367000 | -0.546671000 | -0.665387000 |
| 1 | -3.102282000 | -0.482329000 | 1.115287000  |
| 1 | -2.957575000 | 1.015808000  | 0.163551000  |

### **1W(CO)<sub>5</sub>**

Electronic energy (BP86) = -837.152414

Zero-point correction (BP86) = 0.106868

Thermal correction to Gibbs free energy (BP86) = 0.054128

Electronic energy (M06) = -836.6437627

|   |              |              |              |
|---|--------------|--------------|--------------|
| 6 | -1.514928000 | -3.730016000 | -0.701846000 |
| 6 | -1.514938000 | -3.730012000 | 0.701855000  |
| 7 | -1.515597000 | -2.484434000 | -1.231728000 |

|    |              |              |              |
|----|--------------|--------------|--------------|
| 1  | -1.447918000 | -4.631125000 | -1.311003000 |
| 7  | -1.515612000 | -2.484428000 | 1.231730000  |
| 1  | -1.447937000 | -4.631119000 | 1.311017000  |
| 4  | -1.369257000 | -1.449092000 | 0.000000000  |
| 1  | -1.489159000 | -2.411942000 | -2.244238000 |
| 1  | -1.489188000 | -2.411931000 | 2.244240000  |
| 74 | 0.378788000  | 0.341294000  | -0.000002000 |
| 6  | 0.445555000  | 2.328237000  | 0.000002000  |
| 8  | 0.440048000  | 3.490096000  | 0.000005000  |
| 6  | -1.628959000 | 0.625304000  | -0.000002000 |
| 8  | -2.781947000 | 0.844532000  | -0.000003000 |
| 6  | 2.463177000  | 0.244169000  | -0.000006000 |
| 8  | 3.618016000  | 0.213648000  | -0.000009000 |
| 6  | 0.387223000  | 0.157917000  | -2.048013000 |
| 8  | 0.385619000  | 0.026900000  | -3.200919000 |
| 6  | 0.387228000  | 0.157909000  | 2.048008000  |
| 8  | 0.385627000  | 0.026886000  | 3.200913000  |
